# Supplementary material for: Porous chitosan/partially reduced graphene oxide/diatomite composite as an efficient adsorbent for quantitative colorimetric detection of pesticides in a complex matrix
Source: Royal Society of Chemistry journal article supplement (doi:10.1039/d1an00621e), 2021-01-01
Supplement: d1an00621e1.pdf [file d1an00621e1.pdf]

## Supporting information

### **Porous chitosan/partial reduced graphene oxides/diatomite composite as an efficient adsorbent for quantitative colorimetric detecting of pesticides in complex matrix**

*Guicen Ma<sup>a,b\*</sup>†, Jianrong Cao<sup>a,c†</sup>, Gaohua Hu<sup>a,c</sup>, Li Zhu<sup>a,b</sup>, Hongping Chen<sup>a,b</sup>,  
Xiangchun Zhang<sup>a,b</sup>, Jiahao Liu<sup>d</sup>, Jingjing Ji<sup>d\*</sup>, Xin Liu<sup>a,b\*</sup> and Chengyin Lu<sup>a,b\*</sup>*

<sup>a</sup>Tea Research Institute, Chinese Academy of Agricultural Sciences, Hangzhou,  
China

<sup>b</sup>Laboratory of Quality and Safety and Risk Assessment for Tea Products  
(Hangzhou), Ministry of Agriculture and Rural Affairs, Hangzhou, 310008, China.

<sup>c</sup>Graduate School of Chinese Academy of Agricultural Sciences, Beijing, China

<sup>d</sup>State Key Laboratory of Digital Manufacturing and Equipment Technology,  
School of Mechanical Science and Engineering, Huazhong University of Science and  
Technology, Wuhan 430074, China.

*E-mail: [mgcl314@tricaas.com](mailto:mgcl314@tricaas.com); [liuxin@tricaas.com](mailto:liuxin@tricaas.com); [lchy@tricaas.com](mailto:lchy@tricaas.com);*

*[jjingjing@hust.edu.cn](mailto:jjingjing@hust.edu.cn)*

Phone: +86-571-8665-1650, Fax: +86-571-8665-2004

Address: Tea Research Institute, Chinese Academy of Agricultural Sciences, 9

Meiling South Road, Hangzhou, Zhejiang Province, 310008, China

†Both authors should be considered the same in author order.

## Chemical and Materials

Chitsoan ( $\geq 95\%$  deacetylated), diatomite,  $\text{HAuCl}_4 \cdot 3\text{H}_2\text{O}$  and sodium citrate were purchased from Aladdin company (Shanghai, China). Graphite powder,  $\text{NaNO}_3$ ,  $\text{KMnO}_4$ ,  $\text{H}_2\text{SO}_4$  (98%),  $\text{HCl}$  and  $\text{H}_2\text{O}_2$  (30%) were supplied by Sinopharm Chemical Reagent Co. (Shanghai, China). HPLC grade acetonitrile were obtained from Merck (Darmstadt, Germany). Standards of phosalone and thiram were bought from Dr. Ehrenstorfer GmbH (Germany). The stock solution of pesticides were prepared in acetonitrile. Deionized water was obtained by using a Milli-Q system (Millipore, Milford, USA).

## UPLC-MS/MS analysis

The chromatographic separations were performed using an Ultra-Performance LC-30A system (SHIMADZU), equipped with an Acquity UPLC HSS T3 column ( $100 \times 2.1$  mm i.d., 1.8  $\mu\text{m}$  particle size, Waters, USA). The column temperature and sample temperature were kept at  $40^\circ\text{C}$  and  $4^\circ\text{C}$ , respectively. The sample volume injected was maintained at 3.0  $\mu\text{L}$ . The mobile phase A was methanol containing 1 mmol  $\text{L}^{-1}$  ammonium and mobile phase B was water with 0.1% formic acid. A gradient elution was applied as follows: 90% B at 0-9 min, 0% B at 10-12.0 min, and 90% B at 12.1-14.0 min.

MS/MS analysis in scheduled multiple reaction-monitoring (sMRM) modes was carried out on Triple QUAD 5500 system (SCIEX, USA) equipped with ion-spray interface operated in positive mode. The MS parameters for determination of targeted pesticides were summarized in Table S1. Ion source temperature  $500^\circ\text{C}$ , Ion spray voltage 5.5 kV, desolvation gas ( $\text{N}_2$ ) flow rate 50  $\text{L h}^{-1}$  and cone

gas (Ar) flow rate 50 L h<sup>-1</sup>. The dwell time established for each MRM transition was 0.05 s.

**Table S1** MS parameters of phosalone and thiram analysis by UPLC-MS/MS.

| Pesticide | Quantitative Ion<br>pairs (m/z) | CE | Qualitative Ion<br>pairs(m/z) | CE |
|-----------|---------------------------------|----|-------------------------------|----|
| Phosalone | 368.5>182                       | 18 | 368.5>322                     | 13 |
| Thiram    | 241.1>88.1                      | 13 | 241.1>120                     | 18 |

**Table S2** The RGB values of Au NPs with different concentrations of phosalone in acetonitrile, tea matrix purified by CS/prGO/DM composites and crude tea matrix.

| Con.<br>(mg L <sup>-1</sup> ) | Phosalone    |             |             |      |                                   |            |            |      |                  |            |            |      |
|-------------------------------|--------------|-------------|-------------|------|-----------------------------------|------------|------------|------|------------------|------------|------------|------|
|                               | Acetonitrile |             |             |      | Purified tea matrix by CS/prGO/DM |            |            |      | Crude tea matrix |            |            |      |
|                               | R            | G           | B           | G/R  | R                                 | G          | B          | G/R  | R                | G          | B          | G/R  |
| 0                             | 142.91±1.26  | 80.68±1.14  | 103.54±1.41 | 0.56 | 126.71±1.12                       | 62.93±1.14 | 86.81±1.08 | 0.5  | 128.39±1.35      | 64.51±1.14 | 82.19±1.19 | 0.5  |
| 0.05                          | 136.09±1.8   | 79.03±1.14  | 104.88±1.77 | 0.58 | 125.3±1.13                        | 62.97±1.17 | 86.78±1.52 | 0.5  | 129.63±1.18      | 65.72±1.09 | 82.83±1.16 | 0.51 |
| 0.1                           | 132.54±1.07  | 78.78±1.08  | 102.65±1.04 | 0.59 | 125.03±1.22                       | 62.62±1.14 | 85.66±1.23 | 0.5  | 128±1.16         | 64.63±1.02 | 83.82±1.01 | 0.5  |
| 0.2                           | 116.74±1.18  | 83.56±1.15  | 102.9±1.39  | 0.72 | 119.37±1.28                       | 61.64±1.16 | 85.35±1.27 | 0.52 | 123.03±1.15      | 61.99±1.12 | 80.01±1.12 | 0.5  |
| 0.3                           | 106.62±1.12  | 82.19±1.26  | 99.45±1.44  | 0.77 | 104±1.15                          | 58.01±1.15 | 84.07±1.19 | 0.56 | 120.35±1.79      | 64.29±1.2  | 83.3±1.2   | 0.53 |
| 0.4                           | 102.31±1.09  | 84.31±1.09  | 100.31±1.1  | 0.82 | 96.86±1.21                        | 58.86±1.21 | 83.84±1.21 | 0.61 | 119.22±1.17      | 62.03±1.24 | 81.56±1.31 | 0.52 |
| 0.5                           | 105.52±1.49  | 94.87±1.46  | 108.37±1.31 | 0.9  | 86.4±1.35                         | 58.36±1.32 | 80.37±1.33 | 0.68 | 116.56±1.33      | 61.88±1.19 | 82.71±1.18 | 0.53 |
| 0.6                           | 102.14±1.47  | 99.5±1.25   | 112.5±1.4   | 0.97 | 72.88±1.4                         | 54.89±1.39 | 76.89±1.39 | 0.75 | 115.09±1.37      | 60.81±1.21 | 82.03±1.31 | 0.53 |
| 0.7                           | 103.08±1.47  | 101.1±1.46  | 112.09±1.46 | 0.98 | 69.02±1.35                        | 54.07±1.32 | 77.06±1.33 | 0.78 | 113.55±1.42      | 61.88±1.22 | 83.76±1.13 | 0.54 |
| 0.8                           | 98.96±1.36   | 94.79±1.28  | 108.31±1.42 | 0.96 | 67.52±1.29                        | 53.52±1.29 | 76.52±1.29 | 0.79 | 125.56±1.59      | 62.7±1.57  | 81.63±1.52 | 0.5  |
| 0.9                           | 102.74±1.88  | 102.89±1.29 | 115.19±1.28 | 1    | 64.25±1.46                        | 55.53±1.42 | 79.07±1.36 | 0.86 | 116.57±1.34      | 62.37±1.15 | 83.01±1.15 | 0.54 |
| 1                             | 104.03±1.23  | 104.02±1.24 | 114.07±1.27 | 1    | 64.04±1.36                        | 55.95±1.33 | 79.84±1.4  | 0.87 | 114.85±1.39      | 61±1.17    | 81.43±1.19 | 0.53 |
| 1.5                           |              |             |             |      | 63.26±1.42                        | 58.26±1.42 | 81.19±1.43 | 0.92 | 125.4±1.07       | 62.37±1.06 | 81.52±1.16 | 0.5  |
| 2                             |              |             |             |      | 62.23±1.35                        | 58.23±1.35 | 81.23±1.35 | 0.94 | 120.47±1.69      | 59.73±1.27 | 80.26±1.07 | 0.5  |

**Table S3** The RGB values of Au NPs with different concentrations of thiram in acetonitrile, tea matrix purified by CS/prGO/DM composites and crude tea matrix.

| Con.<br>(mg L <sup>-1</sup> ) | Thiram       |             |             |      |                                   |             |             |      |                  |            |            |      |
|-------------------------------|--------------|-------------|-------------|------|-----------------------------------|-------------|-------------|------|------------------|------------|------------|------|
|                               | Acetonitrile |             |             |      | Purified tea matrix by CS/prGO/DM |             |             |      | Crude tea matrix |            |            |      |
|                               | R            | G           | B           | G/R  | R                                 | G           | B           | G/R  | R                | G          | B          | G/R  |
| 0                             | 134.77±2.57  | 75.12±1.18  | 95.26±1.24  | 0.56 | 139.28±1.35                       | 73.16±1.29  | 103.71±1.21 | 0.53 | 129.68±1.65      | 65.8±1.16  | 84.86±1.41 | 0.51 |
| 0.01                          | 136.86±1.48  | 79.75±1.12  | 103.47±1.07 | 0.58 | 147.35±1.31                       | 74.46±1.1   | 104.46±1.1  | 0.51 | 126.44±1.17      | 65.44±1.17 | 82.08±1.38 | 0.52 |
| 0.02                          | 133.07±1.17  | 80.54±1.16  | 102.81±1.08 | 0.61 | 140.36±1.69                       | 72.34±1.21  | 103.34±1.21 | 0.52 | 123.88±2         | 64.45±1.06 | 82.06±1.07 | 0.52 |
| 0.03                          | 132.65±2.13  | 82.31±1.44  | 103.71±1.15 | 0.62 | 141.62±1.12                       | 78.62±1.12  | 107.66±1.16 | 0.56 | 115.03±1.23      | 64.21±1.1  | 81.25±1.17 | 0.56 |
| 0.04                          | 124.87±1.36  | 81.38±1.33  | 104.13±1.27 | 0.65 | 125.35±1.05                       | 71.86±1.21  | 102.37±1.57 | 0.57 | 117.45±1.28      | 64.9±1.17  | 84.71±1.16 | 0.55 |
| 0.05                          | 122.94±1.04  | 85.94±1.04  | 102.94±1.04 | 0.7  | 121.36±1.25                       | 75.36±1.25  | 103.36±1.25 | 0.62 | 109.02±1.67      | 63.02±1.1  | 83.02±1.12 | 0.58 |
| 0.06                          | 117.78±1.16  | 86.78±1.16  | 104.78±1.16 | 0.74 | 121±1.39                          | 74.73±1.15  | 102.82±1.16 | 0.62 | 105.47±1.31      | 62.69±1.2  | 82.02±1.2  | 0.59 |
| 0.07                          | 118.33±1.11  | 87.26±1.12  | 104±1.4     | 0.74 | 117.85±1.18                       | 72.85±1.18  | 102.86±1.51 | 0.62 | 109.41±1.41      | 62.21±1.2  | 82.32±1.18 | 0.57 |
| 0.08                          | 109.6±1.18   | 91.58±1.15  | 105.59±1.15 | 0.84 | 112.09±1.47                       | 72.75±1.15  | 100.04±1.37 | 0.65 | 104.82±1.24      | 62.73±1.19 | 82.73±1.19 | 0.6  |
| 0.09                          | 111.45±1.4   | 93.45±1.4   | 105.65±1.44 | 0.84 | 109.86±1.22                       | 74.11±1.16  | 100.05±1.13 | 0.67 | 106.86±1.11      | 61.87±1.12 | 82.44±1.22 | 0.58 |
| 0.1                           | 110.55±1.3   | 98.55±1.3   | 110.55±1.3  | 0.89 | 101.21±1.59                       | 75.16±1.26  | 97.79±1.29  | 0.74 | 105.05±1.16      | 61.96±1.13 | 82.01±1.12 | 0.59 |
| 0.2                           | 111.94±1.2   | 104.13±1.14 | 115.22±1.27 | 0.93 | 91.67±1.25                        | 86.69±1.24  | 108.68±1.24 | 0.95 | 107.15±1.44      | 58.92±1.29 | 81.03±1.35 | 0.55 |
| 0.3                           | 110.81±1.32  | 103.4±1.24  | 114.09±1.17 | 0.93 | 100.46±1.35                       | 95.87±1.53  | 114.62±1.53 | 0.95 | 93.2±1.19        | 58.2±1.18  | 80.2±1.18  | 0.62 |
| 0.4                           | 112.18±1.17  | 88.2±1.11   | 104.21±1.11 | 0.79 | 113.91±1.39                       | 117.89±1.35 | 128.89±1.35 | 1.03 | 96.11±1.23       | 54.09±1.25 | 78.17±1.25 | 0.56 |
| 0.5                           | 119.5±1.32   | 81.7±1.14   | 102.63±1.14 | 0.68 | 124.61±1.33                       | 127.61±1.33 | 134.61±1.33 | 1.02 | 89.44±1.37       | 54.38±1.35 | 76.4±1.34  | 0.61 |

**Table S4** The PS and TM concentrations of spiked tea purified matrix determined based on UV-vis and RGB analysis (mg L<sup>-1</sup>) (n=3)

| Pesticides | Added | UV-vis        | RSD   | RGB           | RSD   |
|------------|-------|---------------|-------|---------------|-------|
| PS         | 0.55  | 0.56 ± 0.07   | 12.5% | 0.60 ± 0.007  | 1.16% |
| TM         | 0.035 | 0.033 ± 0.004 | 12.1% | 0.037 ± 0.002 | 5.4%  |

The relative standard deviations (RSDs) were calculated from the following equation

$$\text{RSD} = (S * 100) / x$$

In this formula, S stands for the standard deviation and x stands for the mean of the concentration calculated with the help of the calibration plot of the developed system. The standard deviation calculation was carried out on the resulting data matrix using EXCEL software.

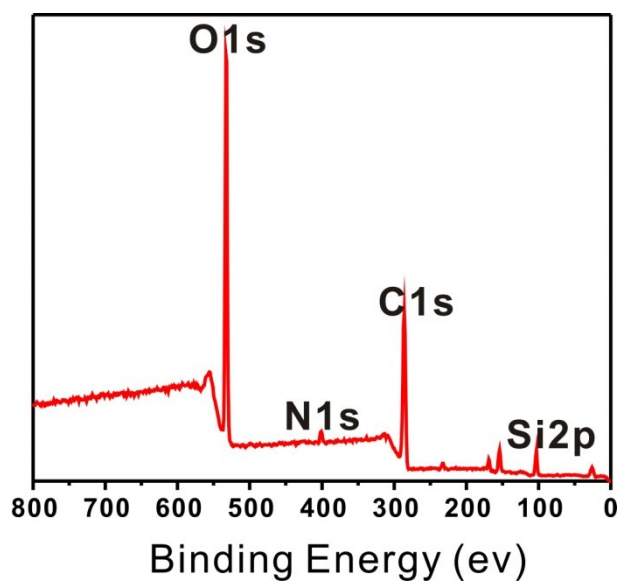

**Fig. S1** The survey XPS spectra for porous CS/prGO/DM composites.

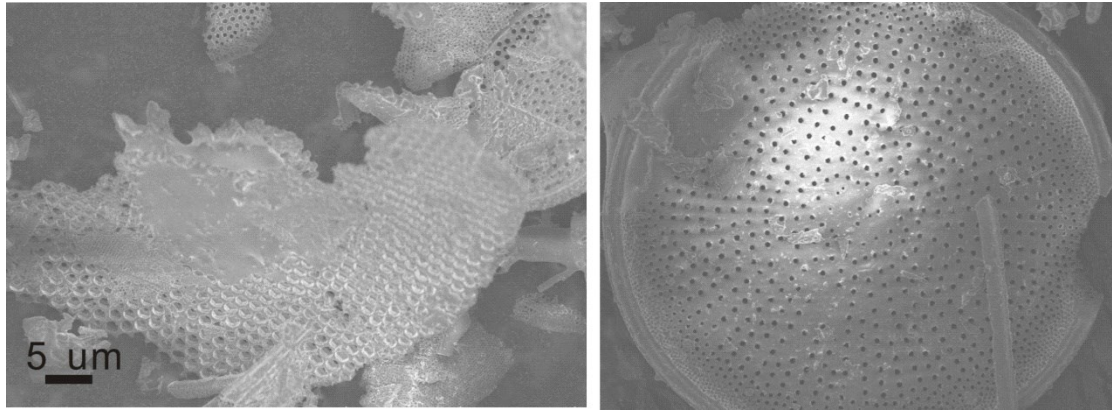

**Fig. S2** The SEM images of DM.



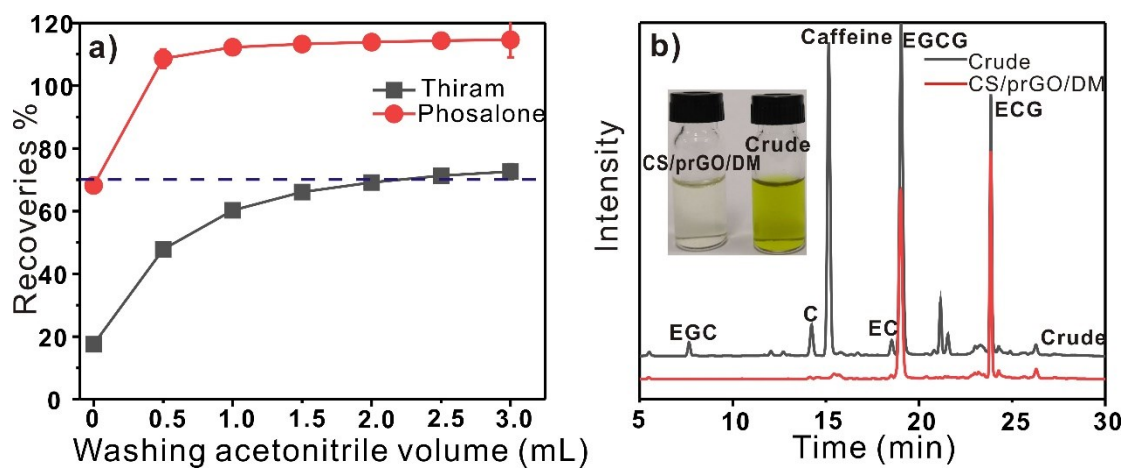

**Fig. S3** a) Recoveries of pesticides after purification by CS/prGO/DM composites; and b) The selective removal ability of tea interferants on CS/prGO/DM composites with good recoveries of pesticides.

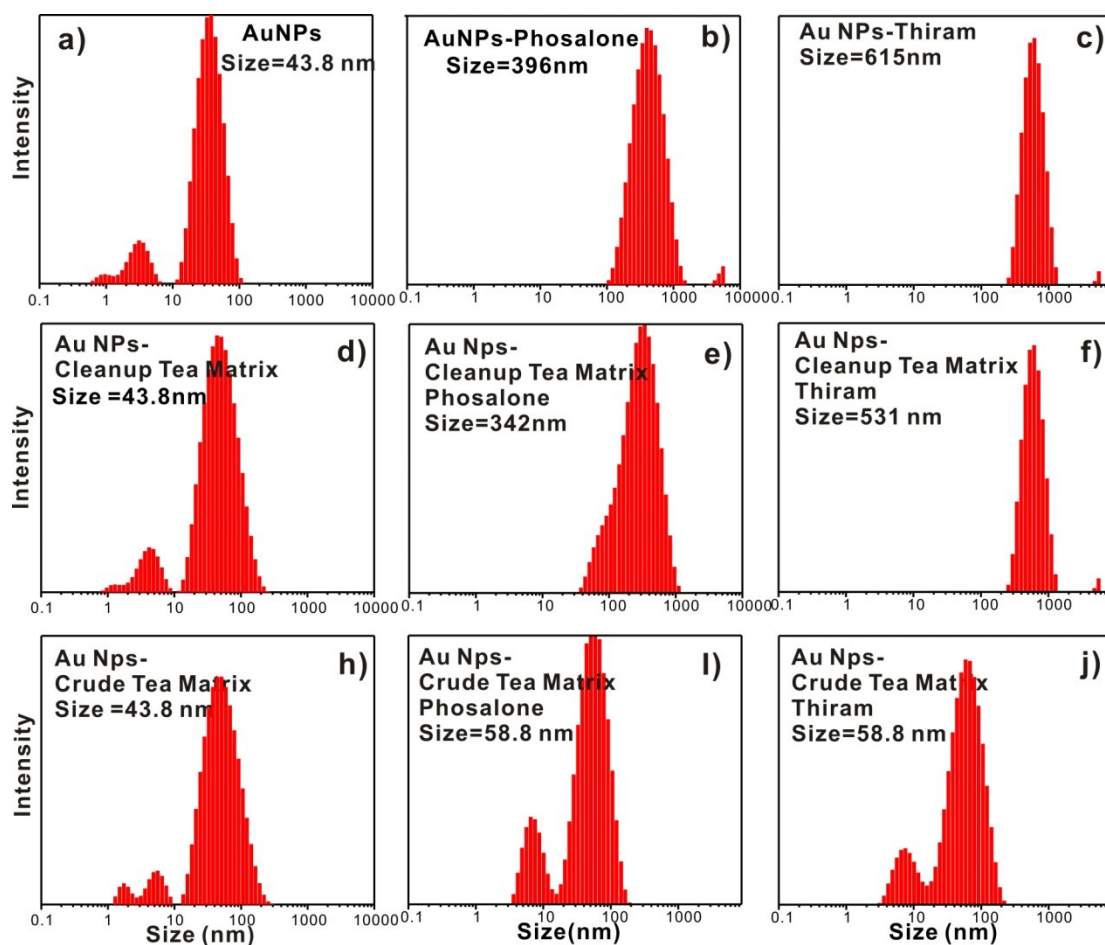

**Fig. S4** Size distribution of Au NPs measured by DLS measurement. a), d), h) are size distribution of Au NPs in acetonitrile, tea matrix purified by porous CS/prGO/DM composites and crude tea matrix, respectively; b),e),i) are size distribution of aggregated Au NPs induced by PS at the concentration of  $2.0 \text{ mg L}^{-1}$  in acetonitrile, purified tea matrix and crude tea matrix, respectively; c),f),j) are size distribution of aggregated Au NPs induced by TM at the concentration of  $0.3 \text{ mg L}^{-1}$  in acetonitrile, purified tea matrix and crude tea matrix, respectively.

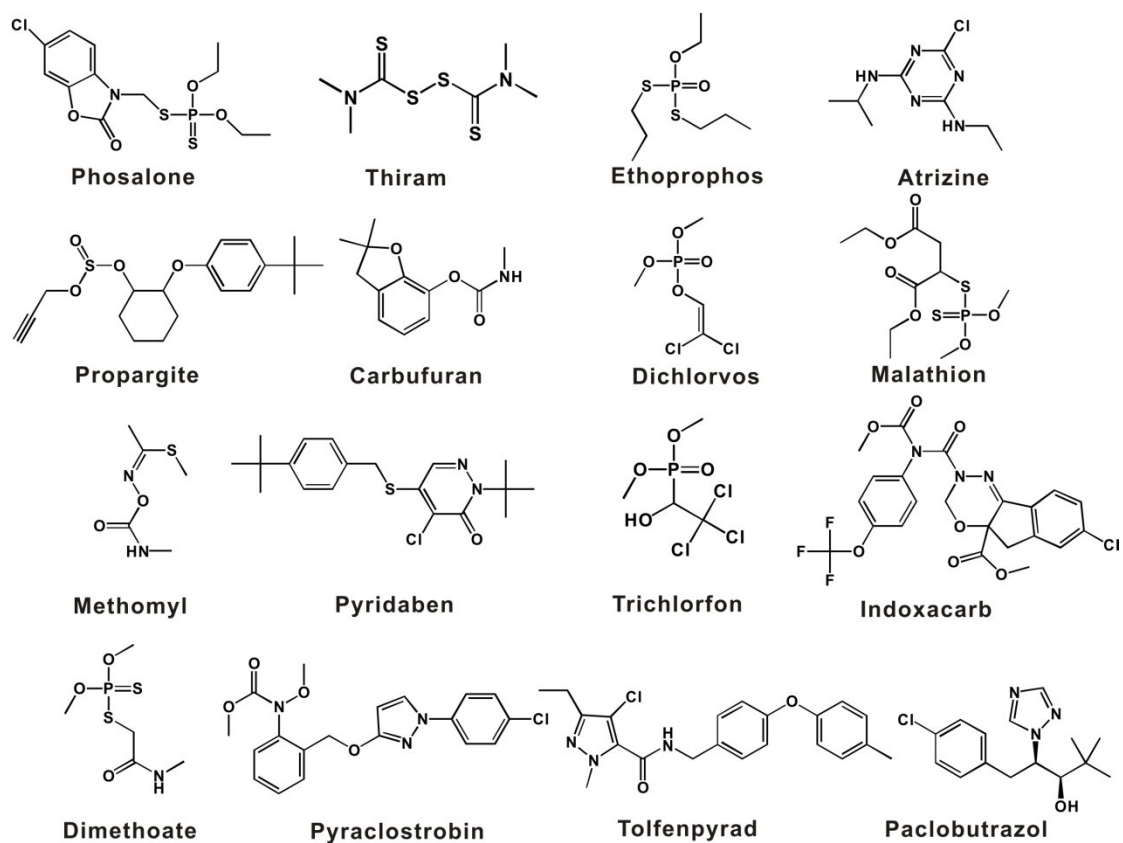

**Fig. S5** The chemical structures of pesticides used for selectivity test.

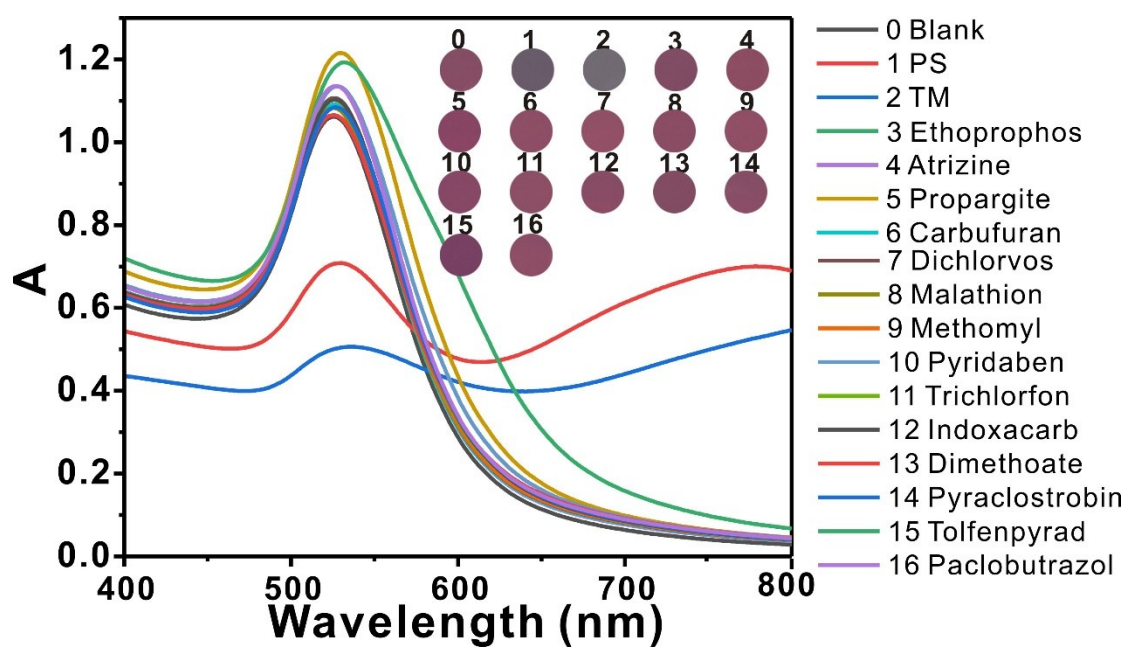

**Fig. S6** The UV-vis spectra of Au NP dispersions with different pesticides.

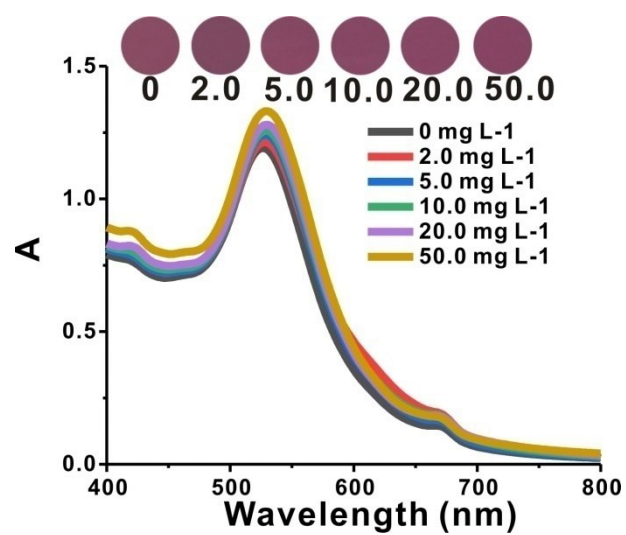

**Fig. S7** UV-vis spectra of Au NPs in crude tea matrix with the concentration of phosalone in the range of 2.0 mg L<sup>-1</sup> to 50 mg L<sup>-1</sup> and their corresponding photographic images.

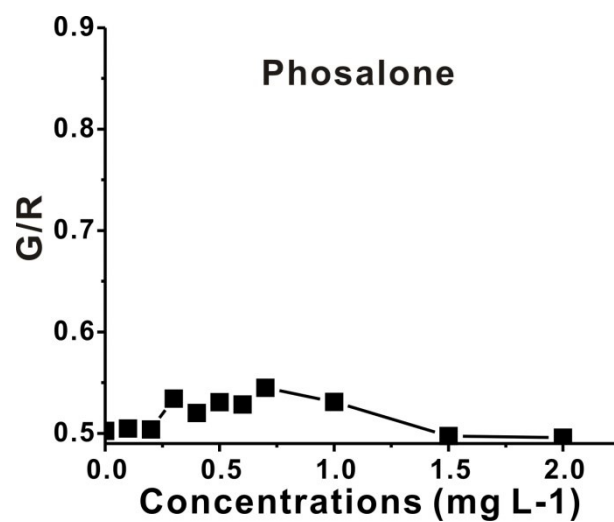

**Fig. S8** The plot of G/R values vs different concentration of phosalone in crude tea matrix.

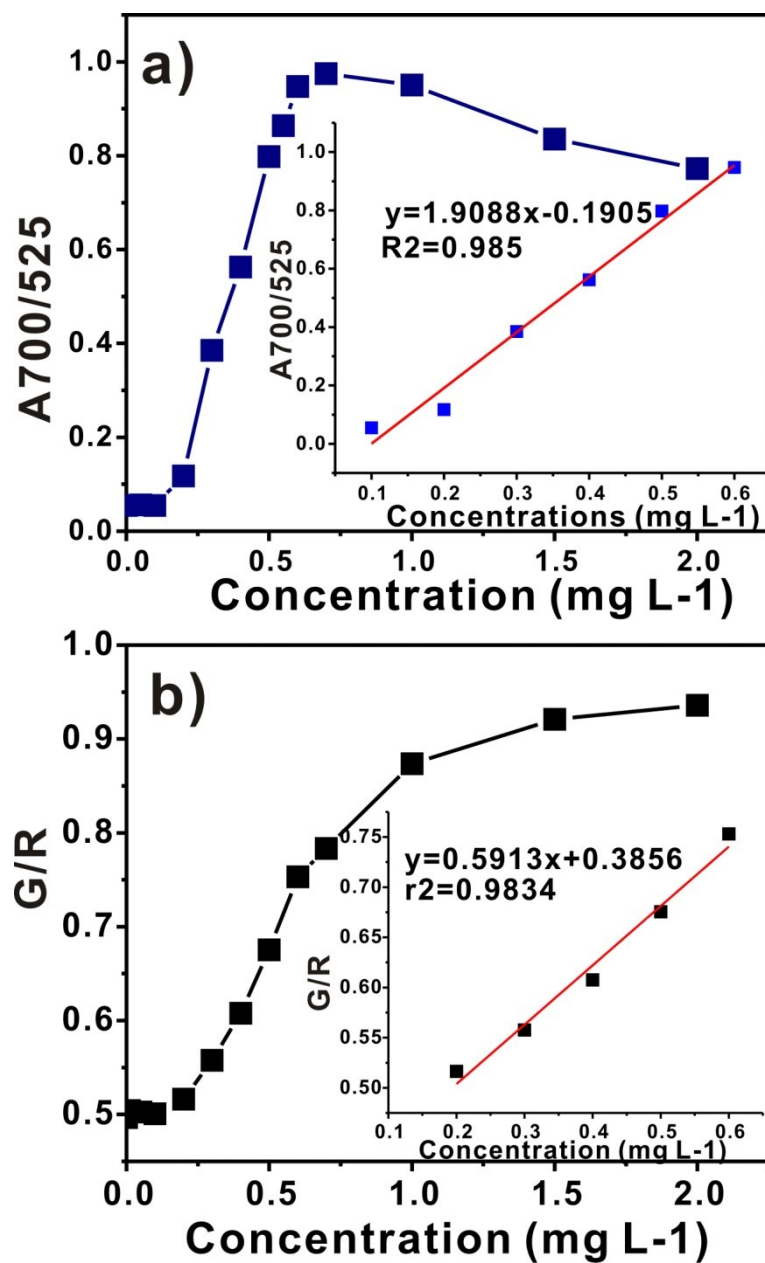

**Fig. S9** The plots of A700/525 values and G/R values vs different concentrations of phosalone in tea matrix purified by porous CS/prGO/DM composites.

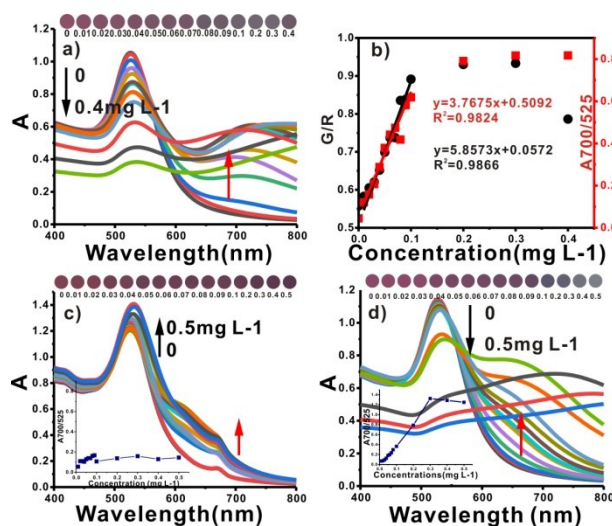

**Fig. S10** UV-vis spectra of colloid Au NPs with the addition of different concentrations of TM in different matrix and their corresponding images. a) TM in acetonitrile; c) TM in crude tea matrix and d) TM in tea matrix purified by porous CS/prGO/DM SPE column. b) the plots of G/R values and A700/525 values versus different concentrations of TM in acetonitrile; Inserts in c) and d) are the plots of A700/525 values versus the concentrations of TM in crude tea matrix and tea matrix purified by porous CS/prGO/DM SPE column, respectively.



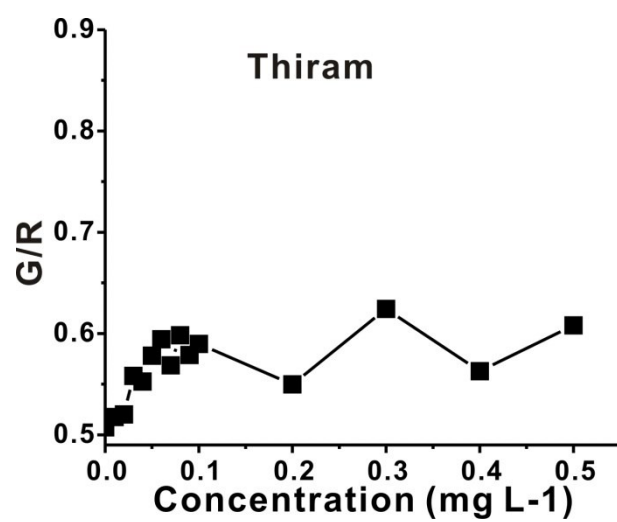

**Fig. S11** The plot of G/R values vs different concentration of TM in crude tea matrix.

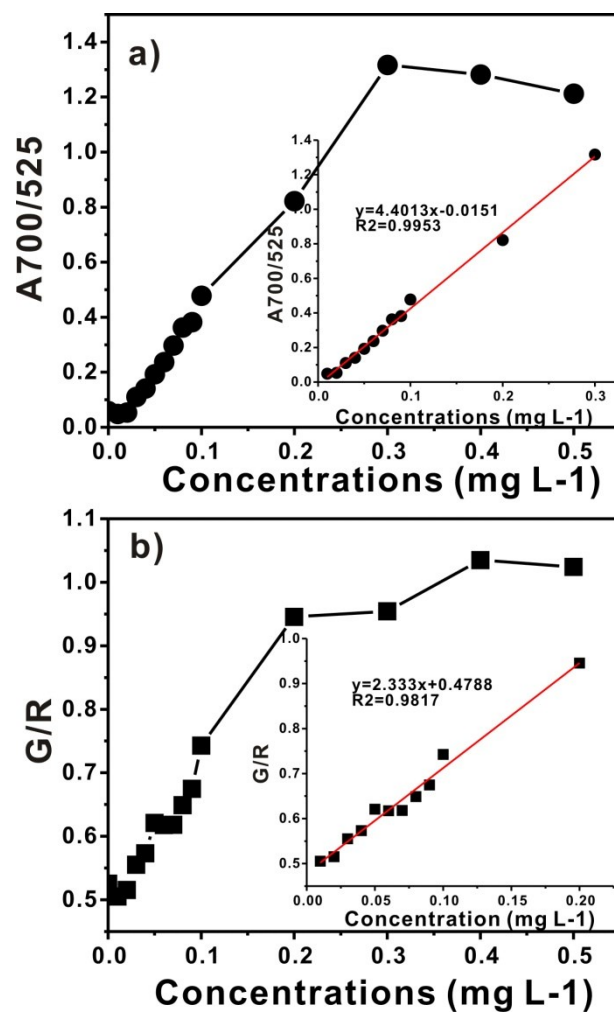

**Fig. S12** The plots of A700/525 values and G/R values vs different concentration of TM in tea matrix purified by porous CS/prGO/DM composites.

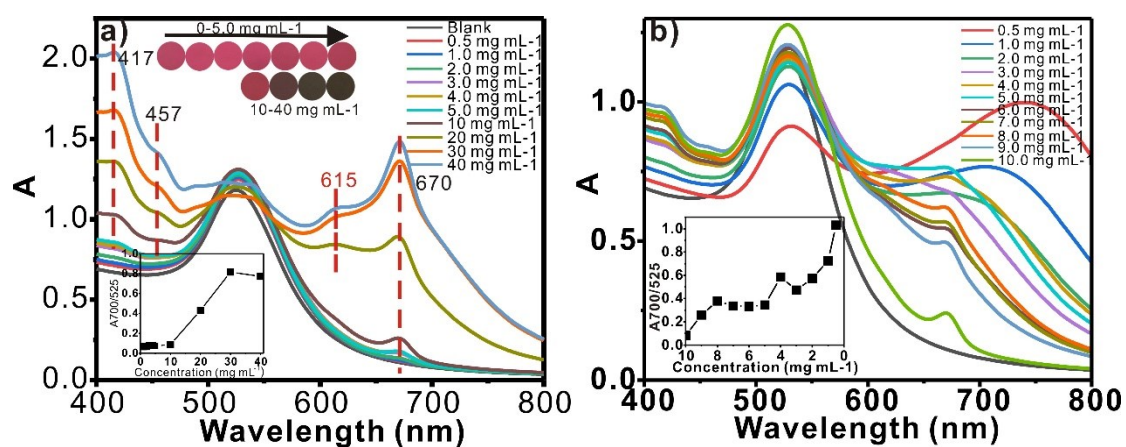

**Fig.S13** a) UV-vis spectra of Au NPs containing different concentrations of tea matrix and the color changes of Au NPs sensing system. Insert is the A<sub>700/525</sub> vs different concentrations of tea matrix; b) UV-vis spectra of Au NPs containing different concentrations of tea matrix in the presence of phosalone at 2.0 mg L<sup>-1</sup>. Insert is the A<sub>700/525</sub> vs different concentrations of tea matrix.
